# Supplementary material
Source: publisher figshare collection journal article supplement (https://acs.figshare.com/ndownloader/files/4714438)
Supplement: Supplementary file 1 [file 4714438]

  
data_z 
  
_audit_creation_method            SHELXL-97 
_chemical_name_systematic 
; 
 ? 
; 
_chemical_name_common             ? 
_chemical_melting_point           ? 
_chemical_formula_moiety          
 'C22 H26 N2 O'  
_chemical_formula_sum 
 'C22 H26 N2 O' 
_chemical_formula_weight          334.45 
  
loop_ 
 _atom_type_symbol 
 _atom_type_description 
 _atom_type_scat_dispersion_real 
 _atom_type_scat_dispersion_imag 
 _atom_type_scat_source 
 'C'  'C'   0.0033   0.0016 
 'International Tables Vol C Tables 4.2.6.8 and 6.1.1.4' 
 'H'  'H'   0.0000   0.0000 
 'International Tables Vol C Tables 4.2.6.8 and 6.1.1.4' 
 'N'  'N'   0.0061   0.0033 
 'International Tables Vol C Tables 4.2.6.8 and 6.1.1.4' 
 'O'  'O'   0.0106   0.0060 
 'International Tables Vol C Tables 4.2.6.8 and 6.1.1.4' 
  
_symmetry_cell_setting            Orthorhombic 
_symmetry_space_group_name_H-M    'P 21 21 21'
_symmetry_space_group_name_Hall   'P 2ac 2ab' 
  
loop_ 
 _symmetry_equiv_pos_as_xyz 
 'x, y, z' 
 '-x+1/2, -y, z+1/2' 
 '-x, y+1/2, -z+1/2' 
 'x+1/2, -y+1/2, -z' 
  
_cell_length_a                    10.5415(7) 
_cell_length_b                    12.4658(8) 
_cell_length_c                    13.8618(9) 
_cell_angle_alpha                 90.00 
_cell_angle_beta                  90.00 
_cell_angle_gamma                 90.00 
_cell_volume                      1821.6(2) 
_cell_formula_units_Z             4 
_cell_measurement_temperature     100(2) 
_cell_measurement_reflns_used     5106 
_cell_measurement_theta_min       2.20 
_cell_measurement_theta_max       33.07 
  
_exptl_crystal_description        prism 
_exptl_crystal_colour             colorless 
_exptl_crystal_size_max           0.51 
_exptl_crystal_size_mid           0.40 
_exptl_crystal_size_min           0.22 
_exptl_crystal_density_meas       ? 
_exptl_crystal_density_diffrn     1.220 
_exptl_crystal_density_method     'not measured' 
_exptl_crystal_F_000              720 
_exptl_absorpt_coefficient_mu     0.075 
_exptl_absorpt_correction_type    none 
_exptl_absorpt_correction_T_min   0.9493 
_exptl_absorpt_correction_T_max   0.9520 
_exptl_absorpt_process_details    ? 
  
_exptl_special_details 
; 
 ? 
; 
  
_diffrn_ambient_temperature       100(2) 
_diffrn_radiation_wavelength      0.71073 
_diffrn_radiation_type            MoK\a 
_diffrn_radiation_source          'fine-focus sealed tube' 
_diffrn_radiation_monochromator   graphite 
_diffrn_measurement_device_type   'Bruker APEX2 CCD area detector' 
_diffrn_measurement_method        'phi and omega scans' 
_diffrn_detector_area_resol_mean  ? 
_diffrn_standards_number          ? 
_diffrn_standards_interval_count  ? 
_diffrn_standards_interval_time   ? 
_diffrn_standards_decay_%         ? 
_diffrn_reflns_number             20481 
_diffrn_reflns_av_R_equivalents   0.0252 
_diffrn_reflns_av_sigmaI/netI     0.0188 
_diffrn_reflns_limit_h_min        -13 
_diffrn_reflns_limit_h_max        13 
_diffrn_reflns_limit_k_min        -16 
_diffrn_reflns_limit_k_max        16 
_diffrn_reflns_limit_l_min        -18 
_diffrn_reflns_limit_l_max        18 
_diffrn_reflns_theta_min          2.20 
_diffrn_reflns_theta_max          27.99 
_reflns_number_total              4362 
_reflns_number_gt                 4198 
_reflns_threshold_expression      'I>2\s(I)' 
  
_computing_data_collection        'APEX2 (Bruker, 2005)'               
_computing_cell_refinement        'APEX2 (Bruker, 2005)'               
_computing_data_reduction         'APEX2 (Bruker, 2005)'               
_computing_structure_solution     'SHELXTL ver. 5.1 (Sheldrick, 1998)' 
_computing_structure_refinement   'SHELXTL ver. 5.1 (Sheldrick, 1998)' 
_computing_molecular_graphics     'SHELXTL ver. 5.1 (Sheldrick, 1998)' 
_computing_publication_material   'SHELXTL ver. 5.1 (Sheldrick, 1998)' 
  
_refine_special_details 
; 
 Refinement of F^2^ against ALL reflections.  The weighted R-factor wR and 
 goodness of fit S are based on F^2^, conventional R-factors R are based 
 on F, with F set to zero for negative F^2^. The threshold expression of 
 F^2^ > 2sigma(F^2^) is used only for calculating R-factors(gt) etc. and is 
 not relevant to the choice of reflections for refinement.  R-factors based 
 on F^2^ are statistically about twice as large as those based on F, and R- 
 factors based on ALL data will be even larger. 
; 
  
_refine_ls_structure_factor_coef  Fsqd 
_refine_ls_matrix_type            full 
_refine_ls_weighting_scheme       calc 
_refine_ls_weighting_details 
 'calc w=1/[\s^2^(Fo^2^)+(0.0576P)^2^+0.3438P] where P=(Fo^2^+2Fc^2^)/3' 
_atom_sites_solution_primary      direct 
_atom_sites_solution_secondary    difmap 
_atom_sites_solution_hydrogens    mexed 
_refine_ls_hydrogen_treatment     constr 
_refine_ls_extinction_method      none 
_refine_ls_extinction_coef        ? 
_refine_ls_abs_structure_details 
 'Flack H D (1983), Acta Cryst. A39, 876-881' 
_refine_ls_abs_structure_Flack    0.5(11) 
_refine_ls_number_reflns          4362 
_refine_ls_number_parameters      226 
_refine_ls_number_restraints      0 
_refine_ls_R_factor_all           0.0358 
_refine_ls_R_factor_gt            0.0340 
_refine_ls_wR_factor_ref          0.0890 
_refine_ls_wR_factor_gt           0.0873 
_refine_ls_goodness_of_fit_ref    1.001 
_refine_ls_restrained_S_all       1.001 
_refine_ls_shift/su_max           0.001 
_refine_ls_shift/su_mean          0.000 
  
loop_ 
 _atom_site_label 
 _atom_site_type_symbol 
 _atom_site_fract_x 
 _atom_site_fract_y 
 _atom_site_fract_z 
 _atom_site_U_iso_or_equiv 
 _atom_site_adp_type 
 _atom_site_occupancy 
 _atom_site_symmetry_multiplicity 
 _atom_site_calc_flag 
 _atom_site_refinement_flags 
 _atom_site_disorder_assembly 
 _atom_site_disorder_group 
O1 O 0.18783(9) 0.68127(8) 0.42148(6) 0.0227(2) Uani 1 1 d . . . 
H1O H 0.2268 0.7438 0.3994 0.027 Uiso 1 1 d R . . 
N1 N 0.28920(9) 0.83535(8) 0.31512(7) 0.0159(2) Uani 1 1 d . . . 
N2 N 0.38266(10) 0.96844(8) 0.15447(8) 0.0182(2) Uani 1 1 d . . . 
C1 C 0.29741(10) 0.75840(9) 0.23766(8) 0.0136(2) Uani 1 1 d . . . 
C2 C 0.22968(10) 0.66256(9) 0.24883(8) 0.0142(2) Uani 1 1 d . . . 
C3 C 0.25121(11) 0.57736(9) 0.18309(9) 0.0165(2) Uani 1 1 d . . . 
H3A H 0.1992 0.5172 0.1852 0.020 Uiso 1 1 calc R . . 
C4 C 0.34682(12) 0.58186(10) 0.11663(9) 0.0178(2) Uani 1 1 d . . . 
H4A H 0.3649 0.5220 0.0790 0.021 Uiso 1 1 calc R . . 
C5 C 0.41849(11) 0.67675(9) 0.10455(8) 0.0161(2) Uani 1 1 d . . . 
C6 C 0.52248(12) 0.67888(11) 0.03941(9) 0.0202(2) Uani 1 1 d . . . 
H6A H 0.5463 0.6165 0.0074 0.024 Uiso 1 1 calc R . . 
C7 C 0.58763(12) 0.77171(11) 0.02353(9) 0.0221(3) Uani 1 1 d . . . 
H7A H 0.6606 0.7712 -0.0142 0.026 Uiso 1 1 calc R . . 
C8 C 0.54393(12) 0.86840(10) 0.06445(9) 0.0204(2) Uani 1 1 d . . . 
H8A H 0.5850 0.9322 0.0493 0.024 Uiso 1 1 calc R . . 
C9 C 0.44129(11) 0.87043(9) 0.12658(8) 0.0162(2) Uani 1 1 d . . . 
C10 C 0.38428(10) 0.77060(9) 0.15804(8) 0.0144(2) Uani 1 1 d . . . 
C11 C 0.40963(12) 0.87300(10) 0.35524(9) 0.0201(2) Uani 1 1 d . . . 
H11A H 0.4707 0.8159 0.3533 0.030 Uiso 1 1 calc R . . 
H11B H 0.3971 0.8953 0.4208 0.030 Uiso 1 1 calc R . . 
H11C H 0.4401 0.9325 0.3179 0.030 Uiso 1 1 calc R . . 
C12 C 0.18990(12) 0.91765(10) 0.31510(10) 0.0206(2) Uani 1 1 d . . . 
H12A H 0.1135 0.8884 0.2881 0.031 Uiso 1 1 calc R . . 
H12B H 0.2171 0.9778 0.2771 0.031 Uiso 1 1 calc R . . 
H12C H 0.1741 0.9407 0.3801 0.031 Uiso 1 1 calc R . . 
C13 C 0.46106(14) 1.06482(10) 0.14574(11) 0.0275(3) Uani 1 1 d . . . 
H13A H 0.5400 1.0539 0.1788 0.041 Uiso 1 1 calc R . . 
H13B H 0.4173 1.1247 0.1739 0.041 Uiso 1 1 calc R . . 
H13C H 0.4773 1.0792 0.0788 0.041 Uiso 1 1 calc R . . 
C14 C 0.26164(13) 0.98372(10) 0.10368(10) 0.0231(3) Uani 1 1 d . . . 
H14A H 0.2111 0.9200 0.1097 0.035 Uiso 1 1 calc R . . 
H14B H 0.2778 0.9978 0.0367 0.035 Uiso 1 1 calc R . . 
H14C H 0.2171 1.0433 0.1314 0.035 Uiso 1 1 calc R . . 
C15 C 0.13573(11) 0.64384(10) 0.33256(8) 0.0165(2) Uani 1 1 d . . . 
C16 C 0.00784(11) 0.69752(9) 0.31045(9) 0.0168(2) Uani 1 1 d . . . 
C17 C -0.04448(12) 0.69043(10) 0.21820(8) 0.0189(2) Uani 1 1 d . . . 
H17A H 0.0006 0.6563 0.1693 0.023 Uiso 1 1 calc R . . 
C18 C -0.16350(12) 0.73383(11) 0.19849(10) 0.0245(3) Uani 1 1 d . . . 
H18A H -0.1969 0.7293 0.1365 0.029 Uiso 1 1 calc R . . 
C19 C -0.23250(13) 0.78387(10) 0.27095(11) 0.0267(3) Uani 1 1 d . . . 
H19A H -0.3122 0.8123 0.2578 0.032 Uiso 1 1 calc R . . 
C20 C -0.18193(14) 0.79119(10) 0.36307(10) 0.0265(3) Uani 1 1 d . . . 
H20A H -0.2277 0.8247 0.4119 0.032 Uiso 1 1 calc R . . 
C21 C -0.06192(13) 0.74819(10) 0.38266(9) 0.0213(2) Uani 1 1 d . . . 
H21A H -0.0284 0.7535 0.4445 0.026 Uiso 1 1 calc R . . 
C22 C 0.10887(12) 0.52467(10) 0.35128(10) 0.0220(2) Uani 1 1 d . . . 
H22A H 0.0498 0.5178 0.4037 0.033 Uiso 1 1 calc R . . 
H22B H 0.1865 0.4888 0.3676 0.033 Uiso 1 1 calc R . . 
H22C H 0.0734 0.4928 0.2943 0.033 Uiso 1 1 calc R . . 
  
loop_ 
 _atom_site_aniso_label 
 _atom_site_aniso_U_11 
 _atom_site_aniso_U_22 
 _atom_site_aniso_U_33 
 _atom_site_aniso_U_23 
 _atom_site_aniso_U_13 
 _atom_site_aniso_U_12 
O1 0.0261(5) 0.0294(5) 0.0127(4) 0.0022(3) -0.0031(3) -0.0081(4) 
N1 0.0162(5) 0.0148(4) 0.0166(4) -0.0028(4) -0.0016(4) -0.0004(4) 
N2 0.0172(5) 0.0141(4) 0.0233(5) 0.0028(4) -0.0038(4) -0.0025(4) 
C1 0.0131(5) 0.0135(5) 0.0141(5) -0.0007(4) -0.0027(4) 0.0011(4) 
C2 0.0139(5) 0.0144(5) 0.0141(5) 0.0027(4) -0.0018(4) -0.0001(4) 
C3 0.0169(5) 0.0145(5) 0.0181(5) 0.0008(4) -0.0028(4) -0.0021(4) 
C4 0.0188(5) 0.0169(5) 0.0178(5) -0.0025(4) -0.0017(4) 0.0032(4) 
C5 0.0152(5) 0.0182(5) 0.0149(5) -0.0002(4) -0.0019(4) 0.0020(4) 
C6 0.0186(6) 0.0250(6) 0.0169(5) -0.0032(4) 0.0001(4) 0.0020(5) 
C7 0.0159(5) 0.0328(7) 0.0176(5) 0.0007(5) 0.0012(4) -0.0007(5) 
C8 0.0192(6) 0.0230(6) 0.0188(5) 0.0045(4) -0.0005(5) -0.0060(5) 
C9 0.0156(5) 0.0176(5) 0.0154(5) 0.0024(4) -0.0036(4) -0.0030(4) 
C10 0.0129(5) 0.0155(5) 0.0149(5) 0.0010(4) -0.0027(4) -0.0014(4) 
C11 0.0210(6) 0.0215(6) 0.0178(5) -0.0026(4) -0.0044(5) -0.0041(5) 
C12 0.0211(6) 0.0165(5) 0.0242(6) -0.0041(5) 0.0033(5) 0.0019(5) 
C13 0.0269(7) 0.0174(6) 0.0382(8) 0.0027(5) -0.0016(6) -0.0066(5) 
C14 0.0213(6) 0.0220(6) 0.0261(6) 0.0052(5) -0.0054(5) 0.0016(5) 
C15 0.0172(5) 0.0183(5) 0.0139(5) 0.0019(4) -0.0005(4) -0.0020(4) 
C16 0.0165(5) 0.0162(5) 0.0177(5) 0.0018(4) 0.0033(4) -0.0030(4) 
C17 0.0177(5) 0.0206(5) 0.0184(5) 0.0006(4) 0.0022(4) 0.0001(5) 
C18 0.0204(6) 0.0259(6) 0.0272(6) 0.0049(5) -0.0039(5) -0.0001(5) 
C19 0.0196(6) 0.0216(6) 0.0390(8) 0.0099(6) 0.0067(5) 0.0032(5) 
C20 0.0287(7) 0.0190(6) 0.0318(7) 0.0029(5) 0.0159(6) 0.0024(5) 
C21 0.0277(6) 0.0175(5) 0.0187(5) 0.0003(4) 0.0077(5) -0.0031(5) 
C22 0.0229(6) 0.0200(6) 0.0230(6) 0.0077(5) 0.0001(5) -0.0029(5) 
  
_geom_special_details 
; 
 All esds (except the esd in the dihedral angle between two l.s. planes) 
 are estimated using the full covariance matrix.  The cell esds are taken 
 into account individually in the estimation of esds in distances, angles 
 and torsion angles; correlations between esds in cell parameters are only 
 used when they are defined by crystal symmetry.  An approximate (isotropic) 
 treatment of cell esds is used for estimating esds involving l.s. planes. 
; 
  
loop_ 
 _geom_bond_atom_site_label_1 
 _geom_bond_atom_site_label_2 
 _geom_bond_distance 
 _geom_bond_site_symmetry_2 
 _geom_bond_publ_flag 
O1 C15 1.4278(14) . ? 
O1 H1O 0.9325 . ? 
N1 C1 1.4423(14) . ? 
N1 C11 1.4632(15) . ? 
N1 C12 1.4657(15) . ? 
N2 C9 1.4228(16) . ? 
N2 C13 1.4633(16) . ? 
N2 C14 1.4695(16) . ? 
C1 C2 1.4004(15) . ? 
C1 C10 1.4422(15) . ? 
C2 C3 1.4177(16) . ? 
C2 C15 1.5434(15) . ? 
C3 C4 1.3667(17) . ? 
C3 H3A 0.9300 . ? 
C4 C5 1.4135(17) . ? 
C4 H4A 0.9300 . ? 
C5 C6 1.4204(16) . ? 
C5 C10 1.4313(16) . ? 
C6 C7 1.3636(19) . ? 
C6 H6A 0.9300 . ? 
C7 C8 1.4094(18) . ? 
C7 H7A 0.9300 . ? 
C8 C9 1.3831(17) . ? 
C8 H8A 0.9300 . ? 
C9 C10 1.4491(15) . ? 
C11 H11A 0.9600 . ? 
C11 H11B 0.9600 . ? 
C11 H11C 0.9600 . ? 
C12 H12A 0.9600 . ? 
C12 H12B 0.9600 . ? 
C12 H12C 0.9600 . ? 
C13 H13A 0.9600 . ? 
C13 H13B 0.9600 . ? 
C13 H13C 0.9600 . ? 
C14 H14A 0.9600 . ? 
C14 H14B 0.9600 . ? 
C14 H14C 0.9600 . ? 
C15 C22 1.5344(16) . ? 
C15 C16 1.5360(17) . ? 
C16 C21 1.3934(17) . ? 
C16 C17 1.3954(16) . ? 
C17 C18 1.3933(18) . ? 
C17 H17A 0.9300 . ? 
C18 C19 1.388(2) . ? 
C18 H18A 0.9300 . ? 
C19 C20 1.387(2) . ? 
C19 H19A 0.9300 . ? 
C20 C21 1.401(2) . ? 
C20 H20A 0.9300 . ? 
C21 H21A 0.9300 . ? 
C22 H22A 0.9600 . ? 
C22 H22B 0.9600 . ? 
C22 H22C 0.9600 . ? 
  
loop_ 
 _geom_angle_atom_site_label_1 
 _geom_angle_atom_site_label_2 
 _geom_angle_atom_site_label_3 
 _geom_angle 
 _geom_angle_site_symmetry_1 
 _geom_angle_site_symmetry_3 
 _geom_angle_publ_flag 
C15 O1 H1O 99.2 . . ? 
C1 N1 C11 116.37(9) . . ? 
C1 N1 C12 120.55(9) . . ? 
C11 N1 C12 113.27(10) . . ? 
C9 N2 C13 115.93(10) . . ? 
C9 N2 C14 110.99(10) . . ? 
C13 N2 C14 110.14(10) . . ? 
C2 C1 C10 119.89(10) . . ? 
C2 C1 N1 117.03(10) . . ? 
C10 C1 N1 122.52(10) . . ? 
C1 C2 C3 119.11(10) . . ? 
C1 C2 C15 122.63(10) . . ? 
C3 C2 C15 118.22(10) . . ? 
C4 C3 C2 121.37(11) . . ? 
C4 C3 H3A 119.3 . . ? 
C2 C3 H3A 119.3 . . ? 
C3 C4 C5 120.56(11) . . ? 
C3 C4 H4A 119.7 . . ? 
C5 C4 H4A 119.7 . . ? 
C4 C5 C6 120.23(11) . . ? 
C4 C5 C10 119.21(10) . . ? 
C6 C5 C10 120.56(11) . . ? 
C7 C6 C5 120.48(12) . . ? 
C7 C6 H6A 119.8 . . ? 
C5 C6 H6A 119.8 . . ? 
C6 C7 C8 119.75(11) . . ? 
C6 C7 H7A 120.1 . . ? 
C8 C7 H7A 120.1 . . ? 
C9 C8 C7 121.46(11) . . ? 
C9 C8 H8A 119.3 . . ? 
C7 C8 H8A 119.3 . . ? 
C8 C9 N2 121.65(11) . . ? 
C8 C9 C10 119.74(11) . . ? 
N2 C9 C10 118.39(10) . . ? 
C5 C10 C1 118.05(10) . . ? 
C5 C10 C9 116.20(10) . . ? 
C1 C10 C9 125.75(10) . . ? 
N1 C11 H11A 109.5 . . ? 
N1 C11 H11B 109.5 . . ? 
H11A C11 H11B 109.5 . . ? 
N1 C11 H11C 109.5 . . ? 
H11A C11 H11C 109.5 . . ? 
H11B C11 H11C 109.5 . . ? 
N1 C12 H12A 109.5 . . ? 
N1 C12 H12B 109.5 . . ? 
H12A C12 H12B 109.5 . . ? 
N1 C12 H12C 109.5 . . ? 
H12A C12 H12C 109.5 . . ? 
H12B C12 H12C 109.5 . . ? 
N2 C13 H13A 109.5 . . ? 
N2 C13 H13B 109.5 . . ? 
H13A C13 H13B 109.5 . . ? 
N2 C13 H13C 109.5 . . ? 
H13A C13 H13C 109.5 . . ? 
H13B C13 H13C 109.5 . . ? 
N2 C14 H14A 109.5 . . ? 
N2 C14 H14B 109.5 . . ? 
H14A C14 H14B 109.5 . . ? 
N2 C14 H14C 109.5 . . ? 
H14A C14 H14C 109.5 . . ? 
H14B C14 H14C 109.5 . . ? 
O1 C15 C22 103.97(9) . . ? 
O1 C15 C16 111.56(10) . . ? 
C22 C15 C16 107.07(10) . . ? 
O1 C15 C2 110.67(9) . . ? 
C22 C15 C2 113.07(10) . . ? 
C16 C15 C2 110.33(9) . . ? 
C21 C16 C17 118.58(12) . . ? 
C21 C16 C15 121.16(11) . . ? 
C17 C16 C15 120.14(11) . . ? 
C18 C17 C16 120.73(12) . . ? 
C18 C17 H17A 119.6 . . ? 
C16 C17 H17A 119.6 . . ? 
C19 C18 C17 120.29(12) . . ? 
C19 C18 H18A 119.9 . . ? 
C17 C18 H18A 119.9 . . ? 
C20 C19 C18 119.63(12) . . ? 
C20 C19 H19A 120.2 . . ? 
C18 C19 H19A 120.2 . . ? 
C19 C20 C21 120.04(12) . . ? 
C19 C20 H20A 120.0 . . ? 
C21 C20 H20A 120.0 . . ? 
C16 C21 C20 120.72(12) . . ? 
C16 C21 H21A 119.6 . . ? 
C20 C21 H21A 119.6 . . ? 
C15 C22 H22A 109.5 . . ? 
C15 C22 H22B 109.5 . . ? 
H22A C22 H22B 109.5 . . ? 
C15 C22 H22C 109.5 . . ? 
H22A C22 H22C 109.5 . . ? 
H22B C22 H22C 109.5 . . ? 
  
loop_ 
 _geom_torsion_atom_site_label_1 
 _geom_torsion_atom_site_label_2 
 _geom_torsion_atom_site_label_3 
 _geom_torsion_atom_site_label_4 
 _geom_torsion 
 _geom_torsion_site_symmetry_1 
 _geom_torsion_site_symmetry_2 
 _geom_torsion_site_symmetry_3 
 _geom_torsion_site_symmetry_4 
 _geom_torsion_publ_flag 
C11 N1 C1 C2 126.26(11) . . . . ? 
C12 N1 C1 C2 -90.16(13) . . . . ? 
C11 N1 C1 C10 -45.16(15) . . . . ? 
C12 N1 C1 C10 98.42(13) . . . . ? 
C10 C1 C2 C3 2.17(16) . . . . ? 
N1 C1 C2 C3 -169.49(10) . . . . ? 
C10 C1 C2 C15 179.70(10) . . . . ? 
N1 C1 C2 C15 8.04(15) . . . . ? 
C1 C2 C3 C4 7.95(17) . . . . ? 
C15 C2 C3 C4 -169.69(11) . . . . ? 
C2 C3 C4 C5 -6.91(18) . . . . ? 
C3 C4 C5 C6 176.29(11) . . . . ? 
C3 C4 C5 C10 -4.26(17) . . . . ? 
C4 C5 C6 C7 176.41(11) . . . . ? 
C10 C5 C6 C7 -3.04(17) . . . . ? 
C5 C6 C7 C8 -6.35(18) . . . . ? 
C6 C7 C8 C9 4.87(19) . . . . ? 
C7 C8 C9 N2 -168.60(11) . . . . ? 
C7 C8 C9 C10 6.00(18) . . . . ? 
C13 N2 C9 C8 -22.41(16) . . . . ? 
C14 N2 C9 C8 104.22(13) . . . . ? 
C13 N2 C9 C10 162.92(11) . . . . ? 
C14 N2 C9 C10 -70.45(13) . . . . ? 
C4 C5 C10 C1 13.90(16) . . . . ? 
C6 C5 C10 C1 -166.65(10) . . . . ? 
C4 C5 C10 C9 -166.17(10) . . . . ? 
C6 C5 C10 C9 13.28(16) . . . . ? 
C2 C1 C10 C5 -12.86(16) . . . . ? 
N1 C1 C10 C5 158.32(10) . . . . ? 
C2 C1 C10 C9 167.22(11) . . . . ? 
N1 C1 C10 C9 -21.60(17) . . . . ? 
C8 C9 C10 C5 -14.66(16) . . . . ? 
N2 C9 C10 C5 160.11(10) . . . . ? 
C8 C9 C10 C1 165.26(11) . . . . ? 
N2 C9 C10 C1 -19.97(17) . . . . ? 
C1 C2 C15 O1 -43.69(14) . . . . ? 
C3 C2 C15 O1 133.86(11) . . . . ? 
C1 C2 C15 C22 -159.87(10) . . . . ? 
C3 C2 C15 C22 17.69(15) . . . . ? 
C1 C2 C15 C16 80.26(13) . . . . ? 
C3 C2 C15 C16 -102.19(12) . . . . ? 
O1 C15 C16 C21 -18.35(15) . . . . ? 
C22 C15 C16 C21 94.78(13) . . . . ? 
C2 C15 C16 C21 -141.79(11) . . . . ? 
O1 C15 C16 C17 165.69(10) . . . . ? 
C22 C15 C16 C17 -81.18(13) . . . . ? 
C2 C15 C16 C17 42.25(14) . . . . ? 
C21 C16 C17 C18 0.51(18) . . . . ? 
C15 C16 C17 C18 176.57(11) . . . . ? 
C16 C17 C18 C19 -0.73(19) . . . . ? 
C17 C18 C19 C20 0.49(19) . . . . ? 
C18 C19 C20 C21 -0.05(19) . . . . ? 
C17 C16 C21 C20 -0.07(18) . . . . ? 
C15 C16 C21 C20 -176.09(11) . . . . ? 
C19 C20 C21 C16 -0.16(19) . . . . ? 
  
_diffrn_measured_fraction_theta_max    0.989 
_diffrn_reflns_theta_full              27.99 
_diffrn_measured_fraction_theta_full   0.989 
_refine_diff_density_max    0.374 
_refine_diff_density_min   -0.226 
_refine_diff_density_rms    0.039 
  
_publ_section_references 

; 
Bruker (2005). APEX2 softwarwe package, Bruker AXS Inc., 5465, 
East Cheryl Parkway, Madison, WI 5317. 

Sheldrick G.M. (1998). SHELXTL v. 5.10, Structure Determination Software 
Suite, Bruker AXS, Madison, Wisconsin, USA. 
;
